# Supplementary material for: Functional evidence that Activin/Nodal signaling is required for establishing the dorsal-ventral axis in the annelid Capitella teleta
Source: Oxford University Press journal article supplement (doi:10.1242/dev.189373), 2020-09-15
Supplement: dev189373supp.pdf [file dev189373supp.pdf]

**Table S1. Detection of transcripts in individual cells of early 2d embryos**

| Gene detected                             | Total number of embryos observed | detection in cell |    |    |    |    |    |    |    |    |    |    |    |
|-------------------------------------------|----------------------------------|-------------------|----|----|----|----|----|----|----|----|----|----|----|
|                                           |                                  | 1a                | 1b | 1c | 1d | 2a | 2b | 2c | 2d | 2A | 2B | 2C | 2D |
| <i>BMP Receptor 2</i> *                   | 5                                | 5                 | 5  | 4  | 4  | 0  | 0  | 0  | 0  | 0  | 0  | 0  | 0  |
| <i>SMAD1/5/8</i> *                        | 12                               | 12                | 12 | 9  | 9  | 0  | 0  | 0  | 0  | 4  | 1  | 0  | 0  |
| <i>activin/inhibin/myostatin-like 5</i>   | 11                               | 11                | 11 | 10 | 5  | 0  | 0  | 0  | 1  | 3  | 0  | 0  | 0  |
| <i>activin/inhibin/myostatin-like 4</i> * | 11                               | 11                | 11 | 9  | 4  | 0  | 0  | 0  | 0  | 1  | 1  | 0  | 0  |
| <i>TSG</i> *                              | 12                               | 12                | 12 | 10 | 3  | 0  | 0  | 0  | 0  | 0  | 0  | 0  | 0  |
| <i>Noggin A</i> *                         | 13                               | 12                | 13 | 7  | 3  | 0  | 0  | 1  | 3  | 0  | 0  | 0  | 0  |

\* denotes differentially expressed genes

**Table S2. TGF-beta components in *C. teleta* and corresponding protein ID numbers**

| <b>TGF-beta Component*</b>                                | <b>Sequence ID</b> |
|-----------------------------------------------------------|--------------------|
| nodal                                                     | 110325             |
| BMP10                                                     | 35187              |
| BMP 5/8                                                   | 172350             |
| BMP 2/4                                                   | 173895             |
| BMP 3                                                     | 184704             |
| ADMP                                                      | 184506             |
| MAVERICK                                                  | 38881              |
| unknown bmp-like ligand                                   | 29529              |
| MYOSTATIN                                                 | 39276              |
| activin/inhibin/myostatin-like 1 TGF $\beta$ class ligand | 223591             |
| activin/inhibin/myostatin-like 2 TGF $\beta$ class ligand | 123463             |
| activin/inhibin/myostatin-like 3 TGF $\beta$ class ligand | 194641             |
| activin/inhibin/myostatin-like 4 TGF $\beta$ class ligand | 165201             |
| activin/inhibin/myostatin-like 5 TGF $\beta$ class ligand | 193459             |
| BMP receptor 1                                            | 111904             |
| Activin receptor 1                                        | 109715             |
| TGF $\beta$ Receptor 1                                    | 227433             |
| Activin Receptor 2                                        | 94926              |
| BMP receptor 2                                            | 117843             |
| SMAD 1/5/8                                                | 173019             |
| SMAD 2/3                                                  | 167863             |
| SMAD 4                                                    | 179368             |
| SMAD 6/7                                                  | 147083             |
| GREMLIN                                                   | 57284              |
| Chordin Like                                              | 224618             |
| TSG                                                       | 165012             |
| Noggin A                                                  | 155479             |
| Noggin B                                                  | 207073             |
| Follistatin                                               | 186626             |
| Tolloid                                                   | 221124             |
| SMURF                                                     | 153266             |
| BAMBI                                                     | 220461             |
| NOMO                                                      | 179513             |

\*See Kenny et al., 2014
